# Supplementary material for: Hybrid nanostructures combining graphene–MoS2 quantum dots for gas sensing
Source: Royal Society of Chemistry journal article supplement (doi:10.1039/c6ta03267b), 2016-01-01
Supplement: c6ta03267b2.pdf [file c6ta03267b2.pdf]

### Supporting information

**Materials.** Graphite powder (500  $\mu\text{m}$ ) was obtained from Shenzhen Nanotech Port Co., Ltd. Bulk molybdenum disulfide, Dimethyl Formamide (DMF), concentrated sulfuric acid (98%), hydrogen peroxide (30%), potassium permanganate were purchased from J&K Scientific, and used as received.

S1 Synthesis of GO. GO was prepared by oxidation of natural graphite powder according to a modified Hummers method. Briefly, 1.0 g graphite powder was added to 23 mL concentrated sulfuric acid under stirring for 50 min at  $-1 \sim 1$   $^{\circ}\text{C}$ . Then 6g potassium permanganate was added slowly and gradually to keep the temperature of suspension below 5  $^{\circ}\text{C}$ . After magnetic stirring for 3 h, the mixture was transferred into 40  $^{\circ}\text{C}$  water bath and kept for 45 min. After that, the temperature was heated to 80  $^{\circ}\text{C}$  and 80 mL DI water was added step by step to maintain the temperature and the solution was stirred for another 15 min. An additional 120 mL DI water and 10.81 mL hydrogen peroxide were added, turning the color from brown to golden yellow. The obtained dispersion was washed and centrifuged for several times to remove the impurities.

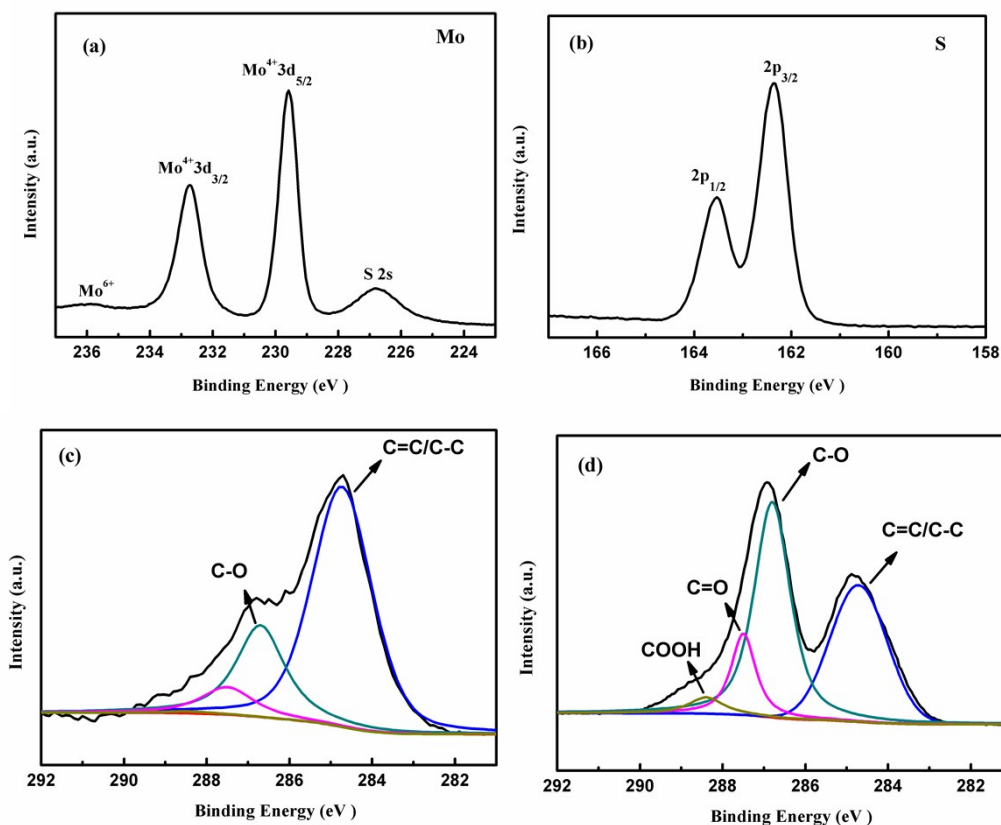

S2 (a-c) XPS spectra of G/MQDs; (d) C1s spectrum of GO nanosheets

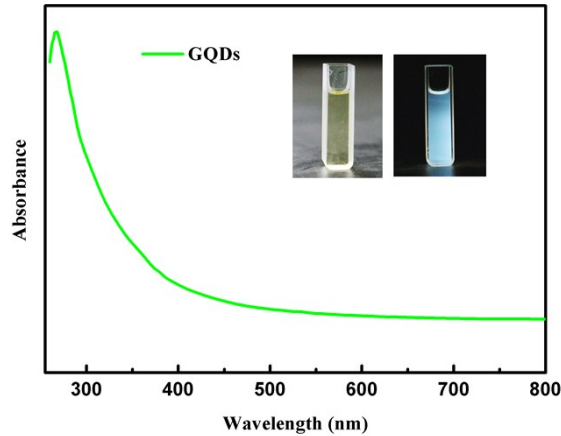

S3 UV-vis spectra of GQDs prepared in DMF. The photographs of GQD solution taken under visible and UV lights are also shown in the insets.

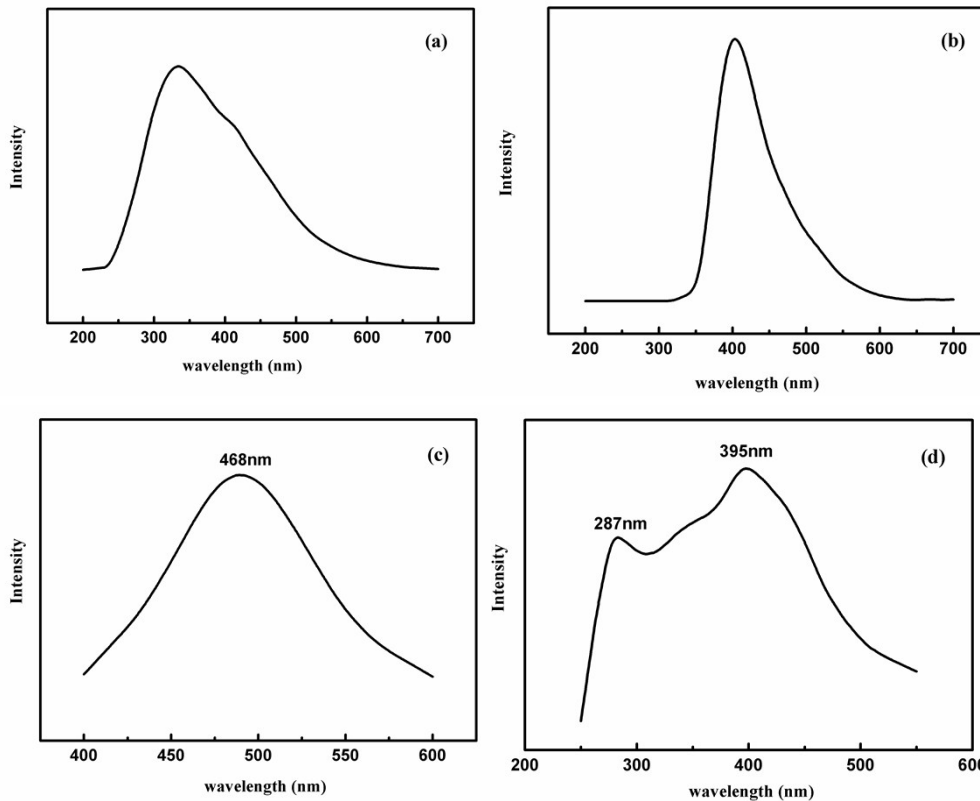

S4 (a) PL spectrum of MQDs excited at 339 nm; (b) PLE spectrum of MQDs with the detection wavelength of 407 nm; (c) PL spectrum of GQDs excited at 395 nm; (d) PLE spectrum of GQDs with the detection wavelength of 468 nm

S5 the calculation of the limits of detection.

The limits of detection (LOD) of G/MQDs devices are calculated based on a signal ( $S$ )-to-noise ( $N$ ) ratio ( $S/N > 3$ ). The details are represented as shown below.

Step I: Take 10 data points at the baseline before gas exposure;

Step II: Plot the data ( $\Delta R/R_0$  ( $Y_i$ ) Vs Time) ;

Step III: A fifth order polynomial fit  $Y$  is executed within the data point range.

Step IV:

$$V_{x^2} = \sum (Y_i - Y)^2$$

Where,  $Y_i$  is the measured data point and  $Y$  is the corresponding value calculated from curve-fitting equation

Step V:

$$\text{rms}_{\text{noise}} = \sqrt{(V_{x^2} / N)}$$

Where,  $N = 10$

$$\text{LOD}(\text{ppb}) = 3 * \left( \frac{\text{rms}_{\text{noise}}}{\text{slope}} \right) * 1000$$

Where, Slope is value obtained from  $\Delta R/R_0$  vs. concentration plot, Fig.4 (c, d), inset.

The related data are shown below:

G/M 3:1 exposed to  $\text{NO}_2$

| Time | $Y_i$        |
|------|--------------|
| 10   | 0.000688707  |
| 20   | 0.000688707  |
| 30   | 0.000688707  |
| 40   | 0.000688707  |
| 50   | -0.000787094 |
| 60   | -0.000787094 |
| 70   | -0.00029516  |
| 80   | -0.000787094 |
| 90   | -0.000787094 |
| 100  | 0.000688707  |

$$\text{rms}_{\text{noise}} = 0.03424052$$

$$\text{slope} = 2.47939$$

$$\text{LOD}(\text{NO}_2) = 41.4 \text{ ppb}$$

G/M 3:1 exposed to  $\text{NH}_3$

| Time | $Y_i$        |
|------|--------------|
| 10   | 0.002209452  |
| 20   | 0.002618623  |
| 30   | -0.001882469 |
| 40   | -0.002923352 |
| 50   | 0.000255818  |
| 60   | 0.002337584  |
| 70   | 0.001971922  |
| 80   | -0.000841585 |
| 90   | 0.001354366  |
| 100  | -0.002923352 |

$$\text{rms}_{\text{noise}} = 0.0473904$$

$$\text{slope} = 2.403$$

$$\text{LOD}(\text{NO}_2) = 35.5 \text{ ppb}$$
